# Supplementary material for: Systematic review and meta-analysis of music interventions in hypertension treatment: a quest for answers
Source: PubMed Central journal article supplement (PMC4837643; doi:10.1186/s12872-016-0244-0), 2016-04-19

**Additional file 3.** Funnel plots

**Legend:** Funnel plots of mean reduction in blood pressure against each study's precision or size.

Because of missing measures of dispersion in 5 out of 10 studies, plotting was also performed against study size.

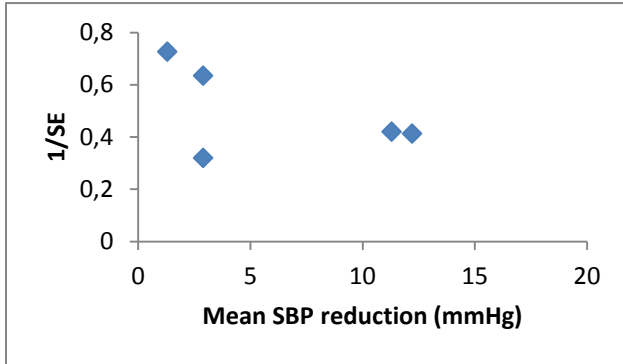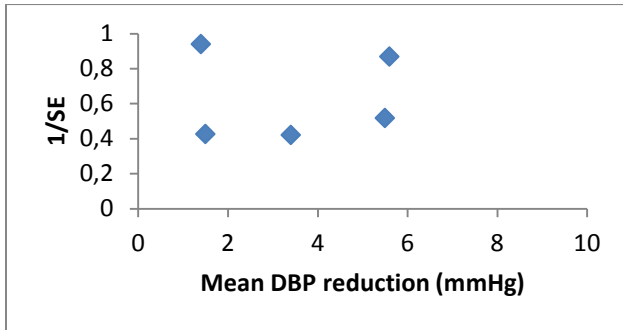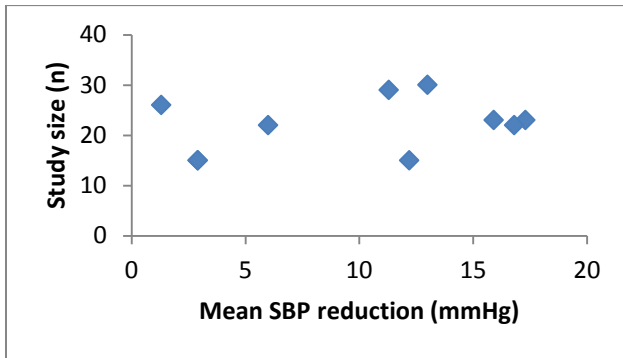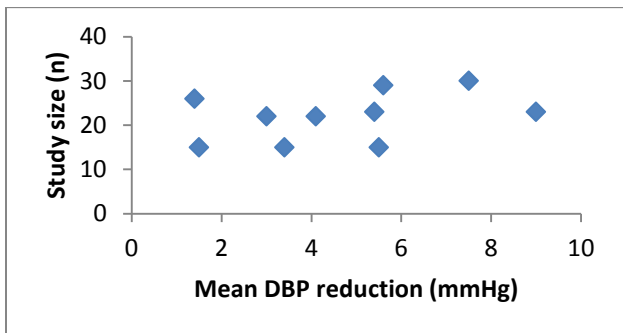

Supplement: 12872_2016_244_MOESM3_ESM.pdf [file 12872_2016_244_MOESM3_ESM.pdf]
