# Supplementary material for: Systematic review and meta-analysis of music interventions in hypertension treatment: a quest for answers
Source: Springer Nature journal article supplement (doi:10.1186/s12872-016-0244-0), 2016-04-19
Supplement: MOESM1 [file 10038676]

## **Additional file 1. Literature Search.**

### **Embase.com 1079 results**

(music/de OR 'acoustic stress'/de OR 'music therapy'/de OR singing/de OR musician/de OR 'auditory stimulation'/de OR 'MP3 player'/de OR 'tape recorder'/de OR 'compact disk'/de OR (music\* OR melod\* OR song\* OR ((audi\* OR acoustic\* OR sound\*) NEAR/6 (stimul\* OR stress)) OR mp3 OR earphone\* OR headphone\* OR ((ear OR head) NEXT/1 phone\*) OR 'compact disk' OR ((cd OR cassette) NEXT/1 player\*) OR speaker\*):ab,ti) AND ('abnormal blood pressure'/de OR 'elevated blood pressure'/exp OR 'blood pressure measurement'/exp OR 'blood pressure meter'/exp OR 'blood pressure'/exp OR (hypertens\* OR ((blood OR arter\* OR diastol\* OR systol\*) NEAR/3 pressure) OR sphygmomanomet\*):ab,ti) NOT ([animals]/lim NOT [humans]/lim)

### **Medline (ovidSP) 751 results**

(music/ OR "music therapy"/ OR singing/ OR "Acoustic Stimulation"/ OR "MP3-player"/ OR "Tape Recording"/ OR Radio/ OR "Compact Disks"/ OR (music\* OR melod\* OR song\* OR ((audi\* OR acoustic\* OR sound\*) ADJ6 (stimul\* OR stress)) OR mp3 OR earphone\* OR headphone\* OR ((ear OR head) ADJ phone\*) OR "compact disk" OR ((cd OR cassette) ADJ player\*) OR speaker\*).ab,ti.) AND (exp "Hypertension"/ OR "Blood Pressure Determination"/ OR exp "blood pressure"/ OR (hypertens\* OR ((blood OR arter\* OR diastol\* OR systol\*) ADJ3 pressure) OR sphygmomanomet\*).ab,ti.) NOT (exp animals/ NOT humans/)

### **Cochrane 194 results**

((music\* OR melod\* OR song\* OR ((audi\* OR acoustic\* OR sound\*) NEAR/6 (stimul\* OR stress)) OR mp3 OR earphone\* OR headphone\* OR ((ear OR head) NEXT/1 phone\*) OR 'compact disk' OR ((cd OR cassette) NEXT/1 player\*) OR speaker\*):ab,ti) AND ((hypertens\* OR ((blood OR arter\* OR diastol\* OR systol\*) NEAR/3 pressure) OR sphygmomanomet\*):ab,ti)

### **Web-of-science 632 results**

TS=(((music\* OR melod\* OR song\* OR ((audi\* OR acoustic\* OR sound\*) NEAR/6 (stimul\* OR stress)) OR mp3 OR earphone\* OR headphone\* OR ((ear OR head) NEAR/1 phone\*) OR "compact disk" OR ((cd OR cassette) NEAR/1 player\*) OR speaker\*)) AND ((hypertens\* OR ((blood OR arter\* OR diastol\* OR systol\*) NEAR/3 pressure) OR sphygmomanomet\*)))

### **PubMed publisher 14 results**

((music\*[tiab] OR melod\*[tiab] OR song\*[tiab] OR ((audi\*[tiab] OR acoustic\*[tiab] OR sound\*[tiab]) AND (stimul\*[tiab] OR stress)) OR mp3[tiab] OR earphone\*[tiab] OR headphone\*[tiab] OR ear phone\*[tiab] OR head phone\*[tiab] OR compact disk\*[tiab] OR cd player\*[tiab] OR cassette player\*[tiab] OR speaker\*[tiab])) AND (((blood[tiab] OR arter\*[tiab] OR diastol\*[tiab] OR systol\*[tiab]) AND pressure[tiab]) OR sphygmomanomet\*[tiab])) AND publisher[sb])

### **Google scholar 200 results**

Music|singing|musician|"auditory stimulation "blood pressure"|hypertension
