# Supplementary material for: Systematic review and meta-analysis of music interventions in hypertension treatment: a quest for answers
Source: Springer Nature journal article supplement (doi:10.1186/s12872-016-0244-0), 2016-04-19
Supplement: MOESM2 [file 10038676]

Additional file 2. Risk of Bias Assessment.

|                   | Sequence generation | Allocation sequence concealment | Blinding of participants* | Blinding of health care providers | Blinding of data collectors | Blinding of outcome assessment | Incomplete outcome data            | Other potential sources of bias                                           |
|-------------------|---------------------|---------------------------------|---------------------------|-----------------------------------|-----------------------------|--------------------------------|------------------------------------|---------------------------------------------------------------------------|
| Bekiroglu (2013)  | Adequate            | Unclear                         | Inadequate                | Unclear                           | Inadequate                  | Adequate                       | No missing data                    | -                                                                         |
| Modesti (2010)    | Unclear             | Unclear                         | Inadequate                | Adequate                          | Unclear                     | Adequate                       | 2 missing data                     | -                                                                         |
| Zanini (2009)     | Adequate            | Unclear                         | Inadequate                | Unclear                           | Unclear                     | Adequate                       | 1 missing data                     | -                                                                         |
| Chan (2009)       | Adequate            | Adequate                        | Inadequate                | Inadequate                        | Inadequate                  | Adequate                       | 3 missing data, imputation of mean | Funding by School of Nursing of Hong Kong Polytechnic University (A-PH29) |
| Tang (2009)       | Adequate            | Unclear                         | Inadequate                | Unclear                           | Unclear                     | Adequate                       | 2 missing data                     | Funding John J. Locke Jr. Charitable Trust, Perpetuity                    |
| Altena (2009)     | Adequate            | Adequate                        | Inadequate                | Unclear                           | Unclear                     | Adequate                       | No missing data, ITT analysis      | Financial support Medical Research Foundation Zwolle                      |
| Pandic (2008)     | Adequate            | Adequate                        | Inadequate                | Unclear                           | Unclear                     | Unclear                        | 1 missing data                     | Grant Health & Medical Care Committee Göteborg & Bohuslän                 |
| Logtenberg (2007) | Adequate            | Unclear                         | Inadequate                | Unclear                           | Unclear                     | Adequate                       | No missing data, ITT analysis      | Financial support Medical Research Foundation and Langerhans Foundation   |
| Schein (2001)     | Adequate            | Unclear                         | Inadequate                | Adequate                          | Adequate                    | Adequate                       | 4 missing data                     | Sponsored by InterCure Ltd, Chief Scientist is last author                |
| Grossman (2001)   | Unclear             | Inadequate                      | Inadequate                | Adequate                          | Adequate                    | Adequate                       | 1 patient changed study-arm        | Sponsored by InterCure Ltd, Chief Scientist is last author                |

\* Blinding of participants was judged as inadequate in all studies as participants cannot be blinded for music-interventions. ITT=Intention To Treat.
